# Supplementary material for: 24 hour movement behaviours and the health and development of pre-school children from Zimbabwean settings: the SUNRISE pilot study
Source: PubMed Central journal article supplement (PMC9924604; doi:10.17159/2078-516x/2021/v33i1a10864), 2021-12-09
Supplement: 2078-516X-33-v33i1a10864-s001.pdf [file 2078-516X-33-v33i1a10864-s001.pdf]

**Supplementary data:**

| <b>Variables</b>                                                                                                                                                                                        | <b>N valid response</b> | <b>n (%)</b>                        | <b>Urban</b>  | <b>Rural</b>  | <b>p-value</b>       |
|---------------------------------------------------------------------------------------------------------------------------------------------------------------------------------------------------------|-------------------------|-------------------------------------|---------------|---------------|----------------------|
| Gross motor skills <sup>a</sup><br>'Requires follow-up and further assessment/action'<br>'Developing on schedule but may benefit from extra practice in some of the skills'<br>'Developing on schedule' | 78                      | 3 (3.8)<br>6 (7.7)<br>69 (88.5)     | 1<br>4<br>31  | 2<br>2<br>38  | 0.551                |
| Fine motor skills <sup>b</sup><br>'Requires follow-up and further assessment/action'<br>'Developing on schedule but may benefit from extra practice in some of the skills'<br>'Developing on schedule'  | 78                      | 12 (15.4)<br>33 (42.3)<br>33 (42.3) | 0<br>11<br>25 | 12<br>22<br>8 | <b>&lt;0.0001***</b> |
| Screen usage before bed <sup>b</sup>                                                                                                                                                                    | 74                      | 41 (55.4)                           | 23 (76.7)     | 18 (40.9)     | <b>0.002***</b>      |
| Presence of screen in bedroom <sup>a</sup>                                                                                                                                                              | 74                      | 11 (14.9)                           | 9 (30.0)      | 2 (4.5)       | <b>0.005***</b>      |
| Consistent bed time <sup>b</sup>                                                                                                                                                                        | 74                      | 51 (68.9)                           | 18 (60.0)     | 33 (75.0)     | 0.171                |
| Consistent wake up time <sup>b</sup>                                                                                                                                                                    | 74                      | 53 (71.6)                           | 21 (70.0)     | 32 (72.7)     | 0.798                |
| Poor quality (rating 3 or below) <sup>a</sup>                                                                                                                                                           | 74                      | 10 (13.5)                           | 1 (3.3)       | 9 (20.5)      | <b>0.042*</b>        |
| Frequency of reading to child - Every day <sup>a</sup>                                                                                                                                                  | 60                      | 10 (13.5)                           | 2 (8.3)       | 8 (22.2)      | 0.289                |
| Restrained sitting for more than 1 hour <sup>a</sup>                                                                                                                                                    | 74                      | 11 (14.9)                           | 7 (23.3)      | 4 (9.1)       | 0.108                |

Differences between urban and rural setting were analysed using: <sup>a</sup>Fisher's Exact test; <sup>b</sup>Chi-Square test.

Bold value indicates statistically significant association at \*p<0.05 and \*\*\*p<0.001.
